# Supplementary material for: Integrated Genomic Analysis Implicates Haploinsufficiency of Multiple Chromosome 5q31.2 Genes in De Novo Myelodysplastic Syndromes Pathogenesis
Source: PLoS One. 2009 Feb 25;4(2):e4583. doi: 10.1371/journal.pone.0004583 (PMC2642994; doi:10.1371/journal.pone.0004583)
Supplement: Table S3 — (0.14 MB XLS) [file pone.0004583.s003.xls]

## Sheet: Supplemental Table3 
Table S3. Allele and genotype frequencies for 47 known SNPs in MDS and race-matched control samples (page 1 of 2)
						MDS						Control						P Value
Function	Gene	rs number	Position	Variant	Codon	n*	AA	AB	BB	MAF		n	AA	AB	BB	MAF		Allele*	Genotype*
Nonsynonymous	BRD8	412051	137504315	A>G	Q1198R	42	41(1.00)	0(0.00)	0(0.00)	0		90‡	90(1.00)	0(0.00)	0(0.00)	0		1	1
	BRD8	6883021	137516239	T>C	L896P	44	43(1.00)	0(0.00)	0(0.00)	0		88‡	88(1.00)	0(0.00)	0(0.00)	0		1	1
	BRD8	11750814	137528564	C>T	T490M	44	28(0.65)	13(0.30)	2(0.05)	0.195402		90‡	58(0.64)	28(0.31)	4(0.04)	0.2		1	0.994
	C5orf5	1135802	137306521	G>A	E822K	43	43(1.00)	0(0.00)	0(0.00)	0		87‡	87(1.00)	0(0.00)	0(0.00)	0		1	1
	CDC23	2231471	137576875	C>T	P3L	45	44(1.00)	0(0.00)	0(0.00)	0		90‡	90(1.00)	0(0.00)	0(0.00)	0		1	1
	CDC25C	11567997	137653127	G>C	G297R	45	41(0.93)	3(0.07)	0(0.00)	0.0337079		90‡	84(0.93)	5(0.06)	1(0.01)	0.039		1	0.7528
	CDC25C	11567962	137693197	G>A	S78N	45	44(1.00)	0(0.00)	0(0.00)	0		88‡	88(1.00)	0(0.00)	0(0.00)	0		1	1
	CDC25C	3734166	137693222	C>T	R70C	45	20(0.45)	20(0.45)	4(0.09)	0.314607		90‡	56(0.62)	32(0.36)	2(0.02)	0.2		0.0476363	0.0698
	CDC25C	11567959	137694728	G>A	S14N	45	44(1.00)	0(0.00)	0(0.00)	0		86‡	86(1.00)	0(0.00)	0(0.00)	0		1	1
	CTNNA1	11552053	138173760	G>T	D146Y	44	43(1.00)	0(0.00)	0(0.00)	0		88‡	88(1.00)	0(0.00)	0(0.00)	0		1	1
	CTNNA1	28363394	138175838	C>T	A179V	45	43(0.98)	1(0.02)	0(0.00)	0.011236		21†	20(0.95)	1(0.05)	0(0.00)	0.02381		0.540106	0.545192
	CTNNA1	1059043	138281357	G>C	A473P	45	44(1.00)	0(0.00)	0(0.00)	0		86‡	86(1.00)	0(0.00)	0(0.00)	0		1	1
	EGR1	13181973	137829432	C>T	T28I	44	43(1.00)	0(0.00)	0(0.00)	0		88‡	87(0.99)	1(0.01)	0(0.00)	0.00568182		1	1
	HSPA9	17856004	137937358	A>G	Q74R	42	41(1.00)	0(0.00)	0(0.00)	0		89‡	89(1.00)	0(0.00)	0(0.00)	0		1	1
	JMJD1B	6865472	137745164	A>G	A256T	41	40(1.00)	0(0.00)	0(0.00)	0		90‡	90(1.00)	0(0.00)	0(0.00)	0		1	1
	JMJD1B	7706614	137782707	G>A	S1201N	45	41(0.93)	3(0.07)	0(0.00)	0.0337079		90‡	76(0.84)	14(0.16)	0(0.00)	0.0777778		0.192695	0.179081
	KIF20A	3734116	137545031	G>A	E63K	45	44(1.00)	0(0.00)	0(0.00)	0		88‡	86(0.98)	2(0.02)	0(0.00)	0.0113636		0.552201	0.552163
	KIF20A	3172747	137550844	C>T	P839L	45	44(1.00)	0(0.00)	0(0.00)	0		88‡	87(0.99)	1(0.01)	0(0.00)	0.00568182		1	1
	MYOT	6890689	137234459	A>C	K74Q	45	44(1.00)	0(0.00)	0(0.00)	0		90‡	90(1.00)	0(0.00)	0(0.00)	0		1	1
	MYOT	4835657	137250967	A>T	E497D	45	44(1.00)	0(0.00)	0(0.00)	0		89‡	89(1.00)	0(0.00)	0(0.00)	0		1	1
	PKD2L2	1880458	137272416	A>G	I404V	45	32(0.73)	12(0.27)	0(0.00)	0.134831		90‡	54(0.60)	33(0.37)	3(0.03)	0.216667		0.136563	0.2243
	PKD2L2	12187140	137287078	C>T	L507P	45	44(1.00)	0(0.00)	0(0.00)	0		89‡	89(1.00)	0(0.00)	0(0.00)	0		1	1
	WNT8A	7701579	137454567	C>T	T321M	42	41(1.00)	0(0.00)	0(0.00)	0		88‡	88(1.00)	0(0.00)	0(0.00)	0		1	1
*Patient 176267 had del(5)(q13q33)[20/20] and complete loss of heterozygosity at all SNPs, which only contributed one allele to the calculation of allele frequency, and
was excluded from the calculation of genotype frequency.
‡The control data is HapMap-CEU. †The control data is from European group in NCBI. LOC391836 and NPY6R are non-coding genes.
Bold indicates a siginificant difference at P<0.05. Abbreviations are explained in Table 3.
Table S3. Allele and genotype frequencies for 47 known SNPs in MDS and race-matched control samples(page 2 of 2)
						MDS						Control						P Value
Function	Gene	rs number	Position	Variant	Codon	n*	AA	AB	BB	MAF		n	AA	AB	BB	MAF		Allele*	Genotype*
Synonymous	BRD8	423258	137503686	G>A	V1228V	44	19(0.44)	20(0.47)	4(0.09)	0.333333		86‡	43(0.50)	28(0.33)	15(0.17)	0.337209		1	0.2241
	BRD8	2306111	137508821	A>G	P1127P	43	42(1.00)	0(0.00)	0(0.00)	0		89‡	89(1.00)	0(0.00)	0(0.00)	0		1	1
	CDC23	2231480	137553221	T>C	D535D	45	44(1.00)	0(0.00)	0(0.00)	0		89‡	89(1.00)	0(0.00)	0(0.00)	0		1	1
	CDC23	2231479	137553242	A>G	Q528Q	45	44(1.00)	0(0.00)	0(0.00)	0		88‡	87(0.99)	1(0.01)	0(0.00)	0.00568182		1	1
	CTNNA1	11552054	138175842	A>C	L180L	43	39(0.93)	3(0.07)	0(0.00)	0.0352941		21†	20(0.95)	1(0.05)	0(0.00)	0.024		1	1
	CTNNA1	28363488	138294063	G>A	A671A	39	37(0.97)	1(0.03)	0(0.00)	0.012987		22†	21(0.95)	1(0.05)	0(0.00)	0.023		1	1
	CTNNA1	1059110	138294445	G>A	S740S	42	20(0.49)	19(0.46)	2(0.05)	0.277108		90‡	40(0.44)	43(0.48)	7(0.08)	0.316667		0.565849	0.7895
	HSPA9	10117	137920069	C>T	L645L	44	15(0.35)	17(0.40)	11(0.26)	0.448276		87‡	25(0.29)	45(0.52)	17(0.20)	0.454023		1	0.4194
	HSPA9	1042665	137930238	A>G	K316K	43	22(0.52)	19(0.45)	1(0.02)	0.247059		90‡	60(0.67)	26(0.29)	4(0.04)	0.188889		0.33024	0.1731
	JMJD1B	4835678	137736333	T>C	I88I	43	19(0.45)	15(0.36)	8(0.19)	0.364706		89‡	29(0.33)	41(0.46)	19(0.21)	0.444		0.23252	0.3614
	JMJD1B	10073922	137745112	G>A	E238E	41	19(0.48)	17(0.43)	4(0.10)	0.320988		90‡	44(0.49)	32(0.36)	14(0.16)	0.333		0.887524	0.6118
	JMJD1B	17294563	137761790	A>G	V952V	39	26(0.68)	9(0.24)	3(0.08)	0.194805		24†	14(0.58)	9(0.38)	1(0.04)	0.229		0.656775	0.4686
	JMJD1B	7726234	137782594	C>T	G1163G	45	19(0.43)	17(0.39)	8(0.18)	0.370787		89‡	29(0.33)	41(0.46)	19(0.21)	0.44382		0.293189	0.4881
	KLHL3	17171525	136989465	G>T	G537G	45	41(0.93)	3(0.07)	0(0.00)	0.0337079		89‡	79(0.89)	9(0.10)	1(0.01)	0.0617978		0.397842	0.6338
	KLHL3	2301708	136997692	G>A	E461E	42	24(0.59)	15(0.37)	2(0.05)	0.228916		87‡	49(0.56)	30(0.34)	8(0.09)	0.264368		0.645576	0.6963
	KLHL3	2905608	137055928	G>A	A157A	42	24(0.59)	15(0.37)	2(0.05)	0.228916		82‡	82(1.00)	0(0.00)	0(0.00)	0		2.18732e-10	0.0001
	LRRTM2	11744283	138237303	C>A	L282L	45	43(0.98)	1(0.02)	0(0.00)	0.011236		90‡	79(0.88)	11(0.12)	0(0.00)	0.0611111		0.111679	0.1029
	SIL1	3088052	138484714	A>G	T51T	45	14(0.32)	18(0.41)	12(0.27)	0.483146		87‡	27(0.31)	39(0.45)	21(0.24)	0.465517		0.795531	0.8946
	WNT8A	6596422	137454346	G>A	A247A	45	8(0.18)	25(0.57)	11(0.25)	0.52809		87‡	28(0.32)	41(0.47)	18(0.21)	0.442529		0.194815	0.2375
Non-coding	LOC391836	11746692	137974254	C>A	NA	45	12(0.27)	17(0.39)	15(0.34)	0.52809		23†	7(0.30)	10(0.44)	6(0.26)	0.478		0.591832	0.7986
	LOC391836	13165665	137974399	A>G	NA	45	15(0.34)	17(0.39)	12(0.27)	0.460674		24†	7(0.29)	10(0.42)	7(0.29)	0.5		0.7213	0.9175
	LOC391836	11948006	137984097	G>T	NA	45	33(0.75)	9(0.20)	2(0.05)	0.146067		80‡	61(0.76)	17(0.21)	2(0.03)	0.131		0.847555	0.8259
	LOC391836	11948009	137984164	G>A	NA	45	33(0.75)	9(0.20)	2(0.05)	0.146067		86	67(0.78)	17(0.20)	2(0.02)	0.122		0.567824	0.7768
	NPY6R	2228647	137172340	G>A	NA	45	42(0.95)	2(0.05)	0(0.00)	0.0224719		90‡	86(0.96)	4(0.04)	0(0.00)	0.022		1	1
*Patient 176267 had del(5)(q13q33)[20/20] and complete loss of heterozygosity at all SNPs, which only contributed one allele to the calculation of allele frequency, and
was excluded from the calculation of genotype frequency.
‡The control data is HapMap-CEU. †The control data is from European group in NCBI. LOC391836 and NPY6R are non-coding genes.
Bold indicates a siginificant difference at P<0.05. Abbreviations are explained in Table 3.
